# Supplementary material
Source: publisher figshare collection journal article supplement (https://gsapubs.figshare.com/ndownloader/files/40558190)
Supplement: Supplementary file 1 [file 40558190]

## Sheet: Sheet1
Table S1: Summary of experiment results*
Run #	Waterfall drop height, Hwf (cm)	Initial drop height to flow depth ratio Hwf / hriver	Final waterfall face angle (degrees)	Final upstream channel sinuosity	Total volume of bedrock eroded, Vtot (cm3)	Waterfall retreat distance (straight line) (cm)	Waterfall retreat distance (along tortuous inner channels) (cm)	Normalized erosion, Vtot / Hwf	Number of new steps formed above initial waterfall	Step wavelength (cm)
1	5	6	45	1.54	2570	48	74	281	6	12.3
2	10	12.5	56	1.19	2568	26	31	256.8	4	7.75
3	20	25	62	1.03	3110	9	9.3	155	0	-
*All experiments had the same initial channel width (5 cm), initial upstream flow depth (hriver = 0.8), initial upstream water velocity (0.49 cm/s) initial upstream Froude number (1.7), initial waterfall face angle (45º), and initial channel slope (2%). Additionally, the sediment diameter (1.4 mm), sediment flux (50 g/min) and water flux (0.19 l/s) was the same for each experiment and all three o…

## Sheet: G51039
Inoue, T., et al., 2023, Waterfall height sets the mechanism and rate of upstream retreat: Geology, https://doi.org/10.1130/G51039.1
